# Supplementary material
Source: Royal Society of Chemistry journal article supplement (doi:10.1039/d5mh02395e)
Supplement: d5mh02395e1.pdf [file d5mh02395e1.pdf]

## Bioactive microflower doped triple-network hydrogel for immunomodulation-mediated angio/osteogenesis coordination in mandibular bone regeneration

Haochen Wang<sup>1,2</sup>, Bowen Tan<sup>1,2</sup>, Yanting Wu<sup>1,2</sup>, Yu Li<sup>1,2,\*</sup>, Jinfeng Liao<sup>1,\*</sup>

<sup>1</sup>State Key Laboratory of Oral Diseases & National Center for Stomatology & National Clinical Research Center for Oral Diseases, West China Hospital of Stomatology, Sichuan University, Chengdu 610041, Sichuan, China.

<sup>2</sup>State Key Laboratory of Oral Diseases & National Center for Stomatology & National Clinical Research Center for Oral Diseases & Department of Orthodontics, West China Hospital of Stomatology, Sichuan University, Chengdu 610041, Sichuan, China.

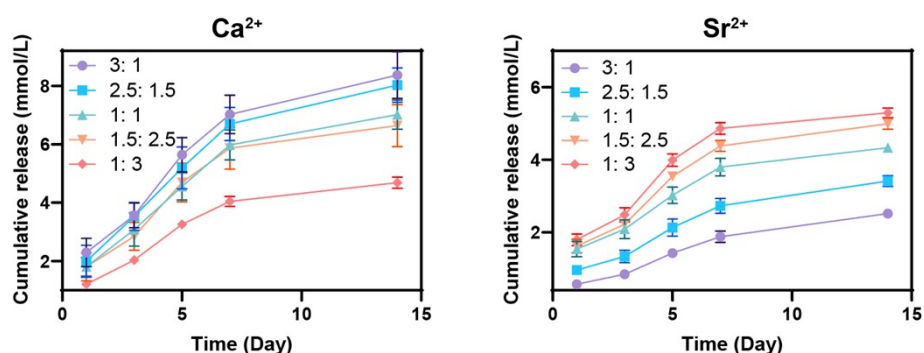

Figure S1. Ion release curves of MFs with different  $\text{Ca}^{2+}/\text{Sr}^{2+}$  ratio.

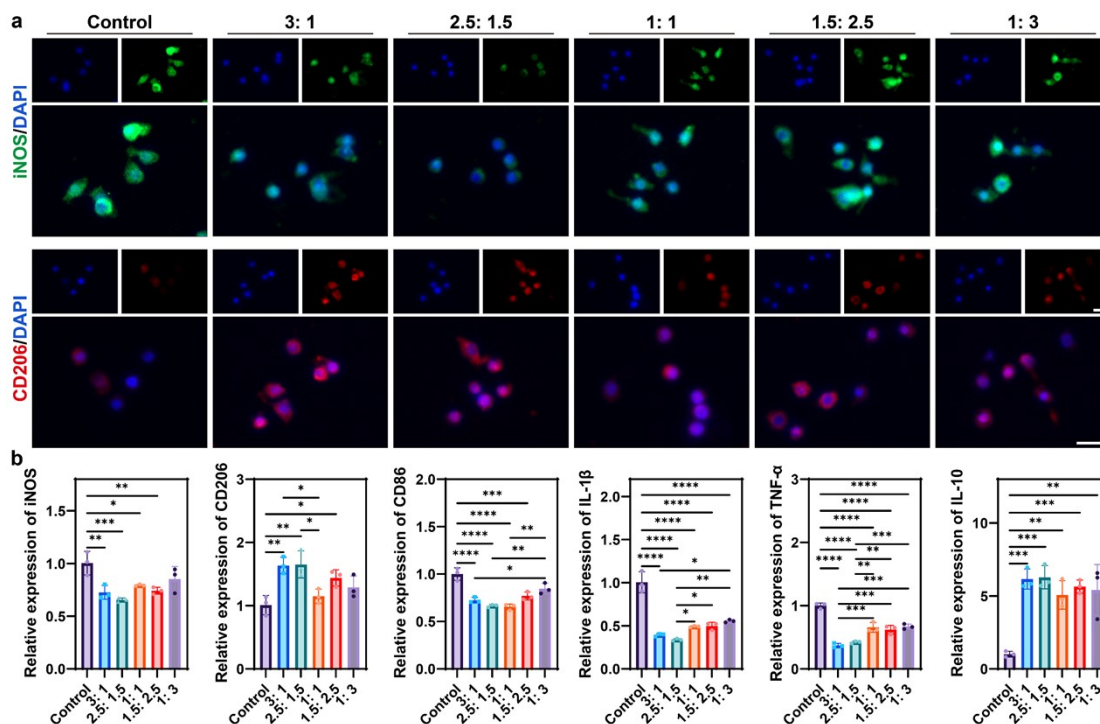

Figure S2. In vitro immunomodulation of macrophages by MFs with different  $\text{Ca}^{2+}/\text{Sr}^{2+}$  ratio. a) Immunofluorescence staining of iNOS (green), CD206 (red) and nuclear (blue) in RAW 264.7 cells. Scale bar = 25  $\mu\text{m}$ . b) Relative mRNA expression of iNOS, CD206, CD86, IL-1 $\beta$ , TNF- $\alpha$  and IL-10 in RAW 264.7 cells. (\* $p < 0.05$ , \*\* $p < 0.01$ , \*\*\* $p < 0.001$ , \*\*\*\* $p < 0.0001$ ).

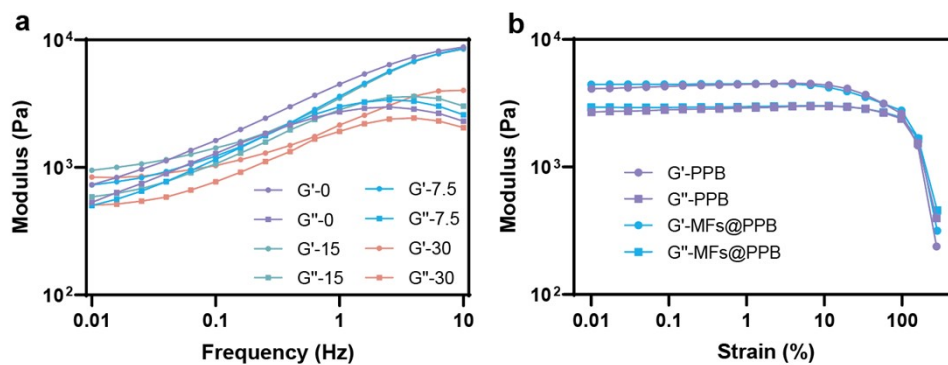

**Figure S3.** Rheological tests. a) Dynamic frequency sweep test of hydrogels with different MFs concentrations. b) Strain sweep test of PPB and MFs@PPB.

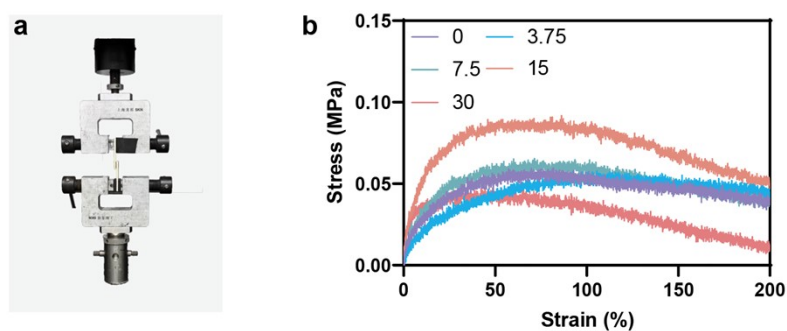

**Figure S4.** Adhesion test. a, b) Photos and stress-strain curves of hydrogels adhering to bovine bone slice.

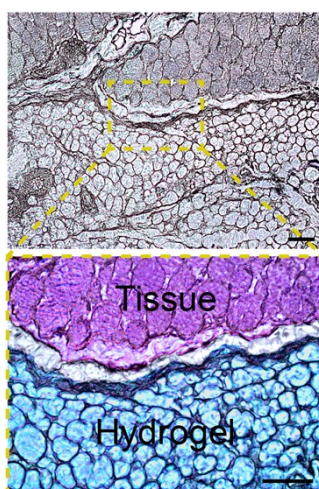

**Figure S5.** Microscopic images of the adhesion of MFs@PPB to the skin. Scale bar = 100  $\mu$ m.

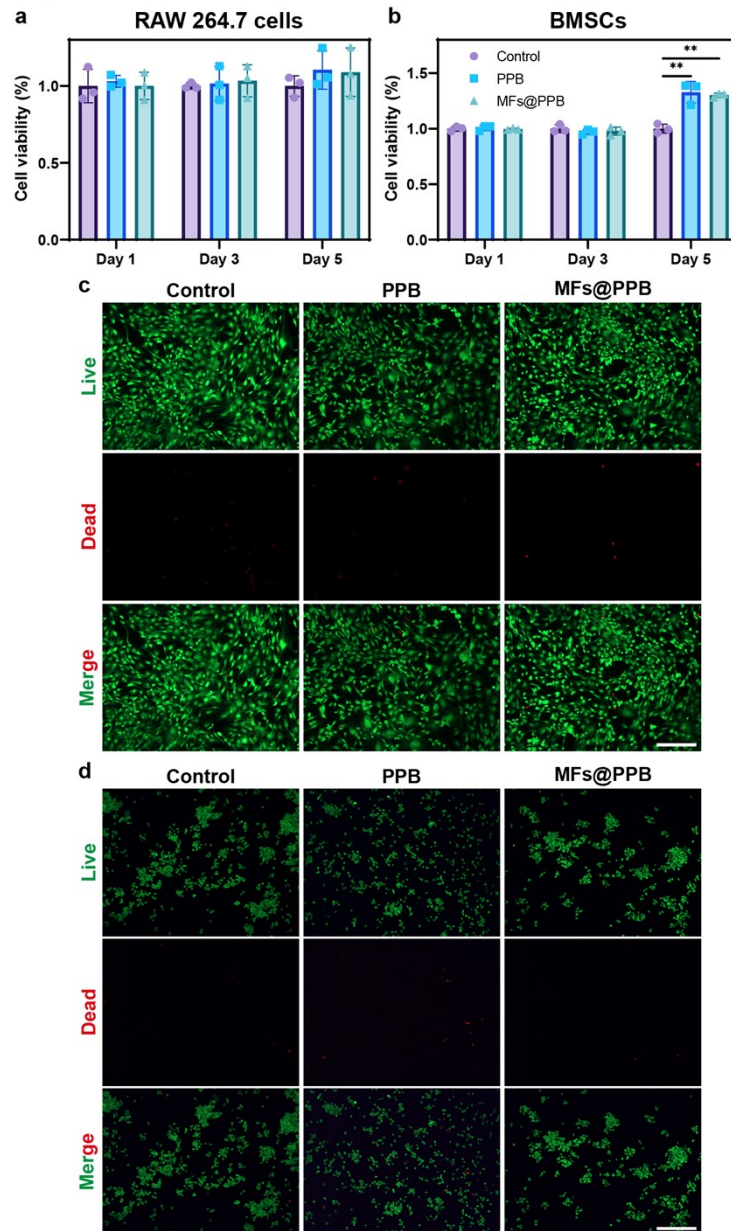

**Figure S6.** In vitro biocompatibility test. a) CCK-8 tests of RAW 264.7 cells and BMSCs. b) Live/dead staining of BMSCs. Scale bar = 250  $\mu\text{m}$ . c) Live/dead staining of RAW 264.7 cells. Scale bar = 250  $\mu\text{m}$ . (\*\*  $p < 0.01$ )

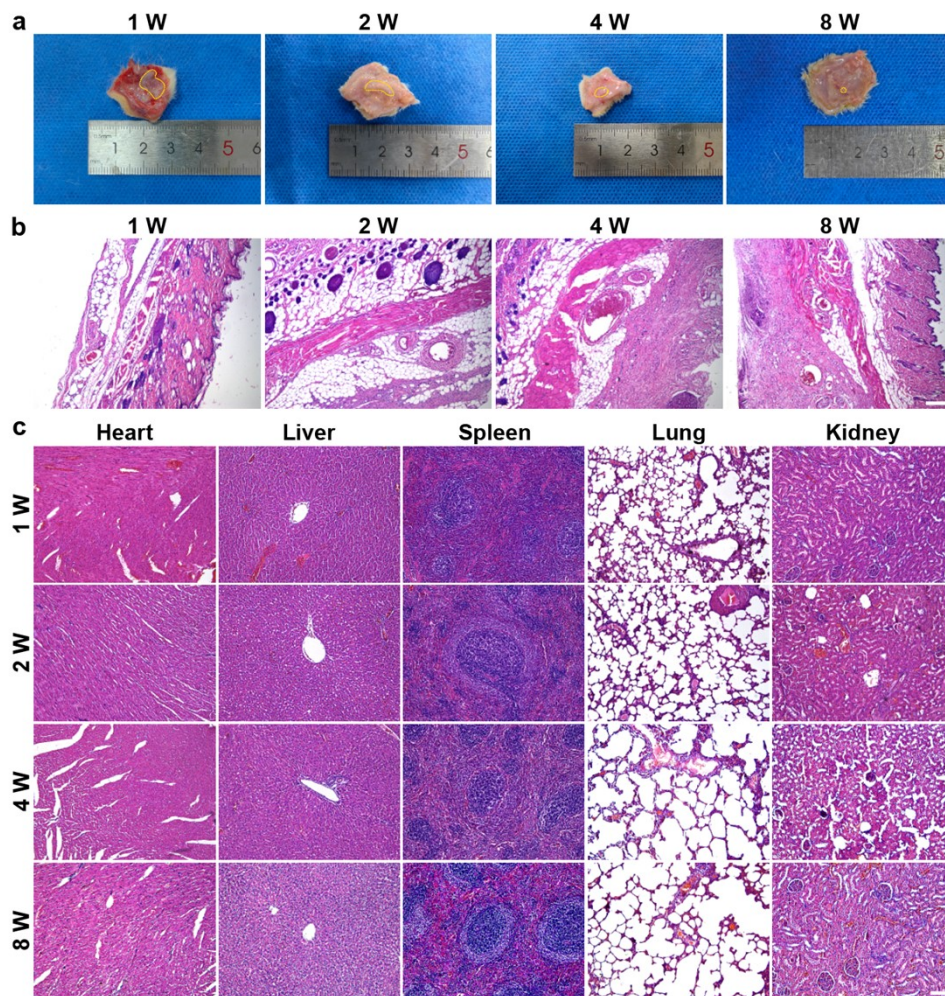

**Figure S7.** Subcutaneous degradation of MFs@PPB. a) Macroscopic images of the subcutaneous hydrogel at different time points. b) H&E staining of the skins and implanted MFs@PPB hydrogel. Scale bar = 250  $\mu$ m. c) HE staining of vital organs, including heart, liver, spleen, lung and kidney. Scale bar = 100  $\mu$ m.

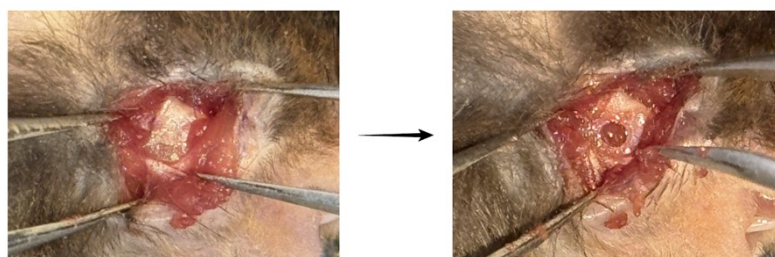

**Figure S8.** Photos of the mouse mandibular bone defect model.

**Table S1.** Primer sequences used in RT-qPCR analysis.

| Gene          | Forward primer      | Reverse primer               |
|---------------|---------------------|------------------------------|
| Mouse-GAPDH   | AAGGCCGGGGCCACTTGAA | GGACTGTGGTCATGAGCCCTTCC<br>A |
| TNF- $\alpha$ | CAGGCGGTGCCTATGTCTC | CGATCACCCCGAAGTTCAGTAG       |

|              |                             |                          |
|--------------|-----------------------------|--------------------------|
| IL-1 $\beta$ | GAAATGCCACCTTTTGACAGTG      | TGGATGCTCTCATCAGGACAG    |
| CD86         | TCAATGGGACTGCATATCTGCC      | GCCAAAATACTACCAGCTCACT   |
| iNOS         | GTTCTCAGCCCAACAATACAAG<br>A | GTGGACGGGTCGATGTCAC      |
| IL-10        | CCCTTTGCTATGGTGCCT          | GTGGCCAGTTTGTTATTTAT     |
| CD206        | CTCTGTTCAGCTATTGGACGC       | TGGCACTCCCAAACATAATTTGA  |
| Human-GAPDH  | CTGGGCTACACTGAGCACC         | AAGTGGTCGTTGAGGGCAATG    |
| VEGF-A       | AGGGCAGAATCATCACGAAGT       | AGGGTCTCGATTGGATGGCA     |
| CD31         | AACAGTGTTGACATGAAGAGCC      | TGTAAAACAGCACGTCATCCTT   |
| Rat-GAPDH    | ACAGCAACAGGGTGGTGGAC        | TTTGAGGGTGCAGCGAACTT     |
| Runx2        | GAACCAAGAAGGCACAGAC         | AATGCGCCCTAAATCACTG      |
| ALP          | AGATGGATGAGGCCATCGGA        | CCAAACGTGAAAACGTGGGA     |
| OCN          | CCCTCTCTCTGCTCACTCTGCT      | CTTACTGCCCTCCTGCTTGG     |
| OPG          | CACGAGCCTTATCCCATTTGTAG     | CTACCATAACCTACCCCTGCTTGT |
